# Supplementary material
Source: HighWire-hosted journal article supplement (https://bmjopen.bmj.com/content/12/1/e051504)

**CONSORT Flow Diagram (Extension to randomised pilot and feasibility trials; Eldridge et al., 2016)**

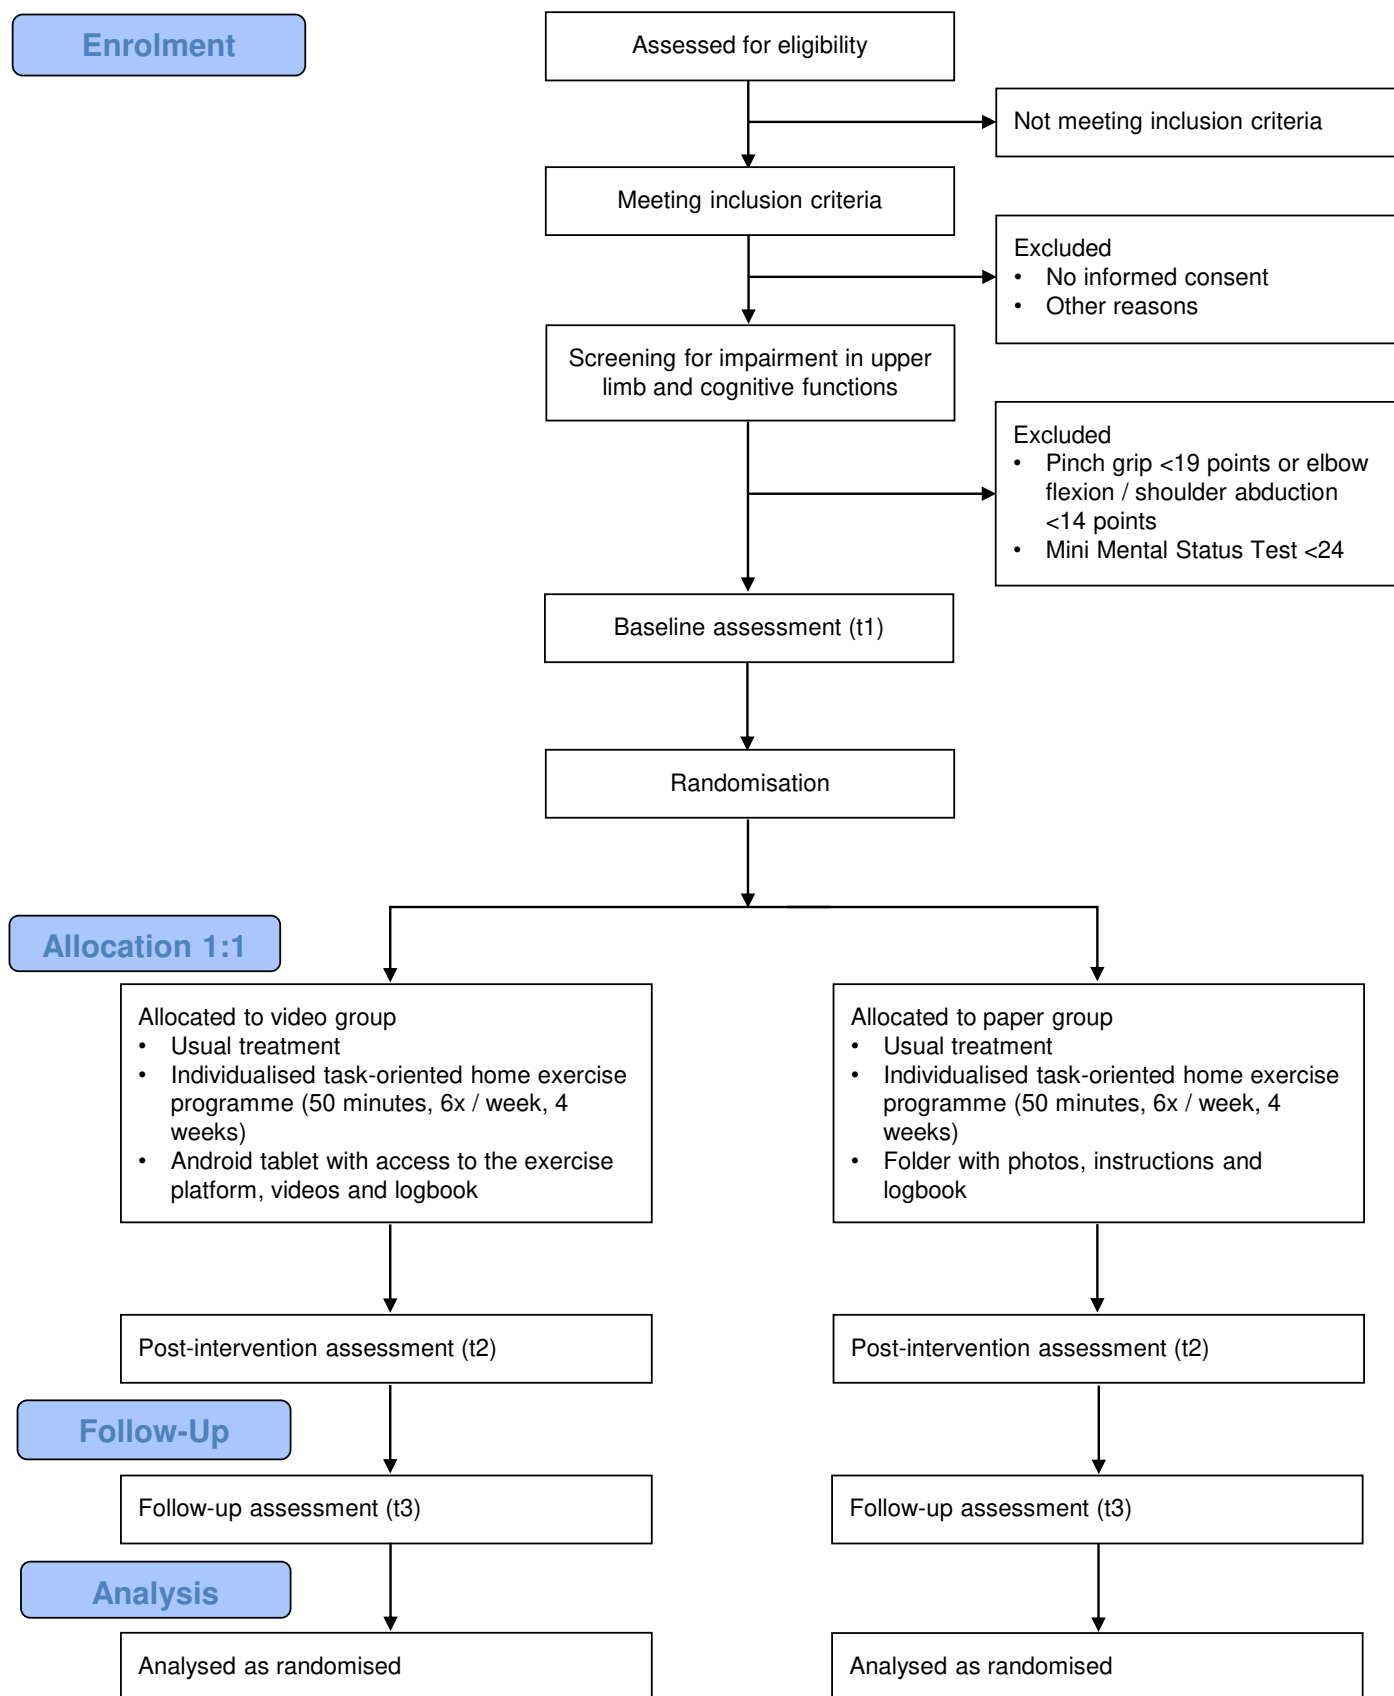

Supplement: inline-supplementary-material-4 [file inline-supplementary-material-4.pdf]
